# Supplementary material
Source: Springer Nature journal article supplement (https://www.springermedizin.de/resource/supplementary/12937_2006_109_MOESM1_ESM.pdf/25654416)

a) Triglyceride

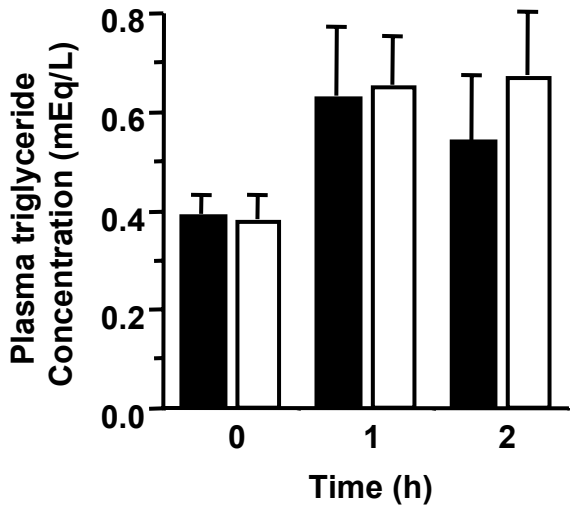

b) NEFA

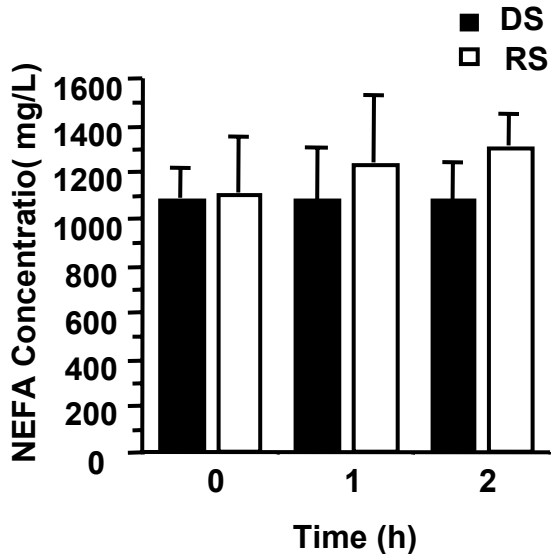

Supplement: MOESM1 [file 25654416]
